# Supplementary material for: Melanoma expression of matrix metalloproteinase-23 is associated with blunted tumor immunity and poor responses to immunotherapy
Source: PubMed Central journal article supplement (PMC4272770; doi:10.1186/s12967-014-0342-7), 2014-12-10

**A**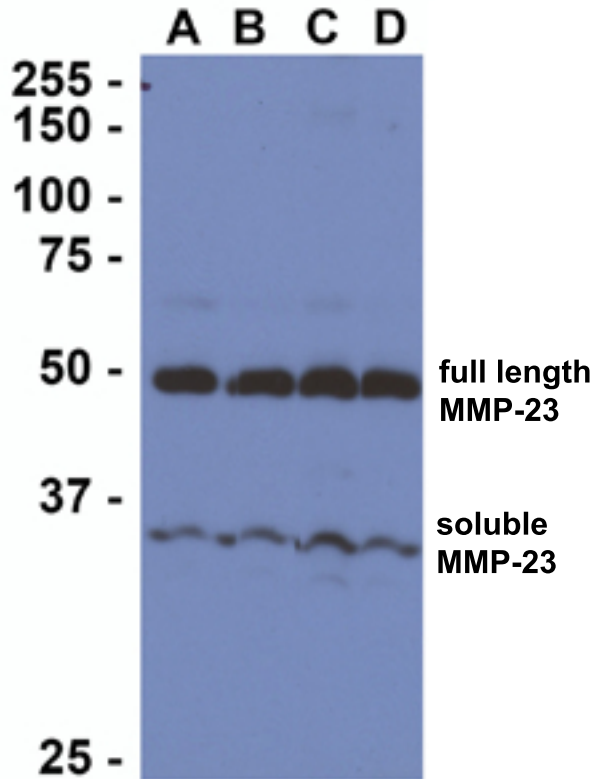**B**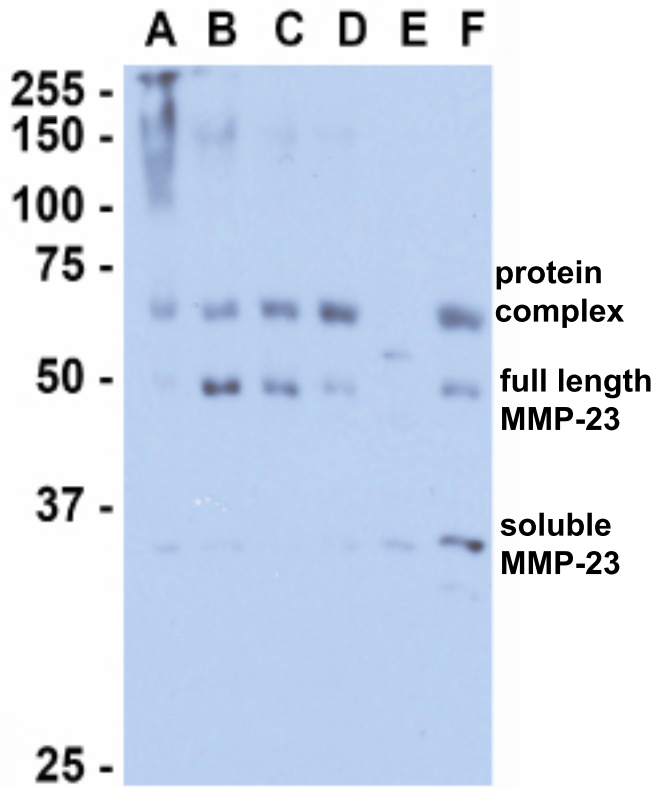

Supplement: 12967_2014_342_MOESM2_ESM.pdf [file 12967_2014_342_MOESM2_ESM.pdf]
